# Supplementary material for: Trehalose catalytic shift is an intrinsic factor in Mycobacterium tuberculosis that enhances phenotypic heterogeneity and multidrug resistance
Source: Research Square preprint supplement (doi:10.21203/rs.3.rs-4999164/v1), 2024-09-13
Supplement: Supplementary file 1 [file 45142d71643e64682f8cde89.docx]

Table S1. Primers used for qRT-PCR and CRISPR*i*-dCas9 cloning.

| Primer name | Rv and MSMEG numbers | Primer sequence (5' 🡪 3') |
| --- | --- | --- |
| **qRT-PCR primers** | | |
| Mtb-TreS-F | treS (Rv0126) | CGGTGACTATTACGTGTGGAG |
| Mtb-TreS-R | GAAGAATCGGTGCCAGTAGAA |
| Mtb-OtsA-F | otsA (Rv3490) | GTTGGCGCCTTTCCTATCT |
| Mtb-OtsA-R | AGGATCTTGCGCGGATTT |
| Mtb-SigA-F | sigA (Rv2703) | ACGAAGACCACGAAGACCTCGAA |
| Mtb-SigA-R | GTAGGCGCGAACCGAGTCGGCGG |
| Mtb-ag85A-F | ag85A (Rv3804c) | TACAAGTGGGAGACCTTCCT |
| Mtb-ag85A-R | AAGAAGCAGCCATCGAAAGA |
| Mtb-ag85C-F | ag85C (Rv0129c) | CAGTTTCTACACCGACTGGTATC |
| Mtb-ag85C-R | TCTCTCTGGTAAGGAAGGTCTC |
| MSMEG-TreS-F | treS (MSMEG_6515) | gttacatacccgtcgagatca |
| MSMEG -TreS-R | cgaagctggaaccagtagaa |
| MSMEG -OtsA-F | otsA (MSMEG_5892) | gggaggcgcatgctgcgccccgat |
| MSMEG -OtsA-R | gcgcgtcgaggaatgag |
| MSMEG -SigA-F | sigA (MSMEG_2758) | cctacgctacgtggtggatt |
| MSMEG -SigA-R | cctacgctacgtggtggatt |
| **sgRNA primers** | | |
| Mtb-sgRNA-TreS-F | treS (Rv0126) | GGGAGacgtcagctcgtcgtggttgc |
| Mtb-sgRNA-TreS-R | AAACgcaaccacgacgagctgacgtC |
| Msmeg-sgRNA-TreS-F | treS (MSMEG_6515) | GGGAGTTGGTGACGGCCATGACGAT |
| Msmeg-sgRNA-TreS-R | AAACATCGTCATGGCCGTCACCAAC |
| Msmeg-sgRNA-OtsA-F | otsA (MSMEG_5892) | GGGAGGCGCATGCTGCGCCCCGATG |
| Msmeg-sgRNA-OtsA-R | AAACCATCGGGGCGCAGCATGCGCC |
