# Supplementary material for: Trehalose catalytic shift is an intrinsic factor in Mycobacterium tuberculosis that enhances phenotypic heterogeneity and multidrug resistance
Source: Research Square preprint supplement (doi:10.21203/rs.3.rs-4999164/v1), 2024-09-13
Supplement: Supplementary file 2 [file bdc07e0ab0518eecbacfe623.xlsx]

## Sheet: pDST
DR chaRacteR	ITRC ID	phenotypic DST
		LJ DST													MGIT DST
		INH (0.1)	RIF (10)	SM (4)	EMB (2)	KM (40)	CPM (40)	CS (30)	PAS (1)	OFX (2)	AMK (40)	RBU (20)	PZA	PNB (500)	SM (1)	INH (0.1)	RIF (1)	EMB (5)	KM (2.5)	OFX (2)	PZA (100)
DS-1	0A009	S	S	S	S	S	S	S	S	S	S	S	S	S	S	S	S	S	S	S	S		Antibiotic tested for DST
DS-2	0A010	S	S	S	S	S	S	S	S	S	S	S	S	S	S	S	S	S	S	S	S		INH: isoniazid
DS-3	0A020	S	S	S	S	S	S	S	S	S	S	S	S	S	S	S	S	S	S	S	S		RIF: rifampicin
DS-4	0A073	S	S	S	S	S	S	S	S	S	S	S	S	S	S	S	S	S	S	S	S		SM: streptomycin
DS-5	0A089	S	S	S	S	S	S	S	S	S	S	S	S	S	S	S	S	S	S	S	S		EMB: ethambutol
DS-6	0A090	S	S	S	S	S	S	S	S	S	S	S	S	S	S	S	S	S	S	S	S		KM: kanamycin
DS-7	0A176	S	S	S	S	S	S	S	S	S	S	S	S	S	S	S	S	S	S	S	S		CPM: capreomycin
DS-8	0A184	S	S	S	S	S	S	S	S	S	S	S	S	S	S	S	S	S	S	S	S		CS: D-cycloserine
DS-9	0A199	S	S	S	S	S	S	S	S	S	S	S	S	S	S	S	S	S	S	S	-		PAS: p-aminosalicylic acid
DS-10	0B106	S	S	S	S	S	S	S	S	S	S	S	S	S	S	S	S	S	S	S	S		OFX: ofloxacin
DS-11	0B018	S	S	S	S	S	S	S	S	S	S	S	S	S	S	S	S	S	S	S	S		AMI: amikacin
DS-12	0B174	S	S	S	S	S	S	S	S	S	S	S	S	S	S	S	S	S	S	S	S		RBU: rifabutin
DS-13	0B293	S	S	S	S	S	S	S	S	S	S	S	S	S	S	S	S	S	S	S	S		PZA: pyrazinamide
DS-14	0B347	S	S	S	S	S	S	S	S	S	S	S	S	S	S	S	S	S	S	S	-		PNB: para-nitrobenzoic acid
DS-15	0B414	S	S	S	S	S	S	R	S	S	S	S	S	S	S	S	S	S	S	S	S
MDR-1	0A202	R	R	S	R	S	S	S	S	S	S	S	S	S	S	R	R	S	S	S	S
MDR-2	0A048	R	R	S	R	S	S	S	S	S	S	R	S	S	S	R	R	S	S	S	S
MDR-3	0B051	R	R	R	S	S	S	S	S	S	S	R	S	S	S	R	R	S	S	S	S
MDR-4	0B095	R	R	S	S	S	S	S	S	S	S	R	S	S	S	R	R	S	S	S	S
MDR-5	0B121	R	R	R	S	S	S	S	S	S	S	R	S	S	S	R	R	S	S	S	S
MDR-6	0B139	R	R	S	R	S	S	S	S	S	S	R	S	S	S	R	R	S	S	S	S
MDR-7	0B257	R	R	S	R	S	S	S	R	S	S	R	S	S	S	R	R	S	S	S	S
MDR-8	0B272	R	R	R	R	S	S	S	R	S	S	R	R	S	S	R	R	S	S	S	S
MDR-9	0B316	R	R	R	R	S	S	R	S	S	S	R	R	S	S	R	R	S	S	S	S
MDR-10	0B322	R	R	S	S	S	S	S	S	S	S	R	S	S	S	R	R	S	S	S	S
MDR-11	0B374	R	R	S	S	S	S	S	S	S	S	S	S	S	S	R	R	S	S	S	S
MDR-12	0B390	R	R	S	R	S	S	R	S	S	S	R	S	S	S	R	R	S	S	S	S
MDR-13	0A008	R	R	R	R	S	S	S	R	S	S	R	R	S	R	R	R	S	S	S	R
MDR-14	0B123	R	R	R	S	S	S	S	S	S	S	R	S	S	S	R	R	S	S	S	S
MDR-15	0A037	R	R	S	S	S	S	S	S	S	S	R	S	S	S	R	R	S	S	S	S
XDR-1	0B125	R	R	S	S	R	R	R	S	R	R	R	R	S	S	R	R	S	R	R	R
XDR-2	6B113	R	R	R	R	R	R	R	R	R	R	R	S	S	R	R	R	S	R	R	S
XDR-3	0B231	R	R	S	R	S	S	R	S	R	S	S	R	S	S	R	R	S	R	R	R
XDR-4	0B342	R	R	S	R	R	S	R	R	R	S	R	S	S	S	R	R	S	R	R	S
XDR-5	4B359	R	R	S		R	R	R	R	R	R	R	R	R	R	R	R	S	R	R	-
XDR-6	0B379	R	R	R	R	S	S	R	R	R	S	R	R	S	R	R	R	R	R	R	R
XDR-7	4B117	R	R	R	R	R	R	S	S	R	R	R	S	S	R	R	R	S	R	R	R
XDR-8	6B161	R	R	R	R	R	R	R	R	R	R	R	R	S	R	R	R	S	R	S	R
XDR-9	6B077	R	R	S	R	R	R	R	R	R	R	R	R	S	S	R	R	S	R	S	R
XDR-10	4B136	R	R	R	R	R	S	R	S	R	S	R	R	S	R	R	R	S	R	R	R
XDR-11	6B202	R	R	R	R	S	R	R	R	R	S	R	R	S	R	R	R	R	R	R	R
XDR-12	0B005	R	R	R	R	S	S	R	R	R	S	R	R	S	R	R	R	R	S	R	R
XDR-13	0B178	R	R	R	R	R	S	R	R	R	S	R	R	S	R	R	R	R	R	R	R
XDR-14	4A008	R	R	R	R	S	S	S	R	R	S	R	R	S	R	R	R	S	S	S	R
XDR-15	4A139	R	R	R	R	S	S	R	S	R	S	R	R	S	R	R	R	S	S	R	R
RSR-1	0A064-1	S	R	R	R	S	S	S	S	S	S	R	R	S	R	S	R	S	S	S	R
RSR-2	0B206-1	S	R	S	S	S	S	S	S	S	S	R	S	S	S	S	R	S	S	S	S
RSR-3	0B072	S	R	S	S	S	S	S	S	S	S	S	S	S	S	S	R	S	S	S	R
RSR-4	0B389	S	R	S	S	S	S	S	S	S	S	R	S	S	S	S	R	S	S	S	S
RSR-5	0B126	S	R	S	S	S	S	S	S	S	S	R	S	S	S	S	R	S	S	S	S
RSR-6	0B354	S	R	S	S	S	S	R	R	S	S	S	R	S	S	S	R	S	S	S
RSR-7	0A055	S	R	S	S	S	S	S	S	S	S	R	S	S	S	S	R	S	S	S	S
RSR-8	T5(060523)	S	R	S	S	S	-	S	S	S	-	-	S	-	-	-	-	-	-	-	-
RSR-9	0A144	S	R	S	S	S	S	R	S	S	S	S	S	S	S	S	R	R	S	S	S
RSR-10	0A204	S	R	S	R	S	S	S	S	S	S	R	S	S	S	S	R	S	S	S	S
RSR-11	0B069	S	R	S	S	S	S	R	S	S	S	R	S	S	S	S	R	S	S	S	S
RSR-12	0B103	S	R	S	R	S	R	R	S	R	S	R	R	S	S	S	R	S	S	S	R
RSR-13	0B241	S	R	S	S	S	S	R	S	S	S	R	S	S	S	S	R	S	S	S	S
RSR-14	0B273	S	R	S	S	S	S	R	S	R	S	R	S	S	S	S	R	S	S	S	S
RSR-15	0B441	S	R	R	R	R	R	S	S	R	R	R	R	S	R	S	R	S	R	R	R
TDR-1	0B373	R	R	R	R	R	R	R	R	R	R	R	R	S	R	R	R	R	R	R	R
TDR-2	4B013	R	R	R	R	R	R	R	R	R	R	R	R	S	R	R	R	R	R	R	R
TDR-3	0B037	R	R	R	R	R	R	R	R	R	R	R	R	S	R	R	R	R	R	R	R
TDR-4	4B340	R	R	R	R	R	R	R	R	R	R	R	R	S	R	R	R	R	R	R	R
TDR-5	6B373	R	R	R	R	R	R	R	R	R	R	R	R	S	R	R	R	R	R	R	R
TDR-6	0B012	R	R	R	R	R	R	R	R	R	R	S	R	S	R	R	R	S	R	R	R
TDR-7	4B013	R	R	R	R	R	R	R	R	R	R	R	R	S	R	R	R	R	R	R	R
TDR-8	0B016	R	R	R	R	R	R	R	R	R	R	R	R	S	R	R	R	R	R	R	R
TDR-9	4B052	R	R	R	R	R	R	R	R	R	R	R	R	S	S	R	R	S	R	R	R
TDR-10	4B073	R	R	R	R	R	R	R	R	R	R	R	R	S	R	R	R	S	R	R	R
TDR-11	4B280	R	R	R	R	R	R	R	R	R	R	R	R	S	R	R	R	R	R	R	R
TDR-12	4B178	R	R	R	R	R	S	R	R	R	S	R	R	S	R	R	R	S	R	R	R
TDR-13	6B187	R	R	R	R	R	R	R	R	R	R	S	R	S	R	R	R	R	R	R	R
TDR-14	6B373	R	R	R	R	R	R	R	R	R	R	R	R	S	R	R	R	R	R	R	R
TDR-15	4B435	R	R	R	R	R	R	R	R	R	R	R	R	S	R	R	R	R	R	R	R
