# Supplementary material for: Trehalose catalytic shift is an intrinsic factor in Mycobacterium tuberculosis that enhances phenotypic heterogeneity and multidrug resistance
Source: Research Square preprint supplement (doi:10.21203/rs.3.rs-4999164/v1), 2024-09-13
Supplement: Supplementary file 3 [file ed4c68f0cafe8b55d5edc18f.docx]

**Trehalose catalytic shift is an intrinsic factor in *Mycobacterium tuberculosis* that enhances phenotypic heterogeneity and multidrug resistance**.

Jae Jin Lee1, Daniel H. Swanson2, Sun-Kyung Lee3, Stephanie Dihardjo1, Gi Yong Lee1, Sree Gelle1, Emily R. Maskill2, Zachary E. Taylor4, Michael S. Van Nieuwenhze4, Abhyudai Singh5, Jong-Seok Lee,3 Seokyong Eum3, SangNae Cho3, Benjamin M. Swarts2, Hyungjin Eoh*,1,6

1 Department of Molecular Microbiology and Immunology, Keck School of Medicine, University of Southern California, Los Angeles, CA., 90033, USA

2 Department of Chemistry and Biochemistry, Central Michigan University, Mount Pleasant, MI, 48859, USA.

3 Division of Immunology and Cellular Immunology, International Tuberculosis Research Center, Changwon 51755, Republic of Korea.

4 Department of Chemistry and Biochemistry, Baylor University, Waco, TX, 76798, USA

5 Department of Electrical and Computer Engineering, Biomedical Engineering, Mathematical Sciences, University of Delaware, Newark, DE., 19716, USA

6 Department of Ophthalmology, Keck School of Medicine, University of Southern California, Los Angeles, CA., 90033, USA

*, Corresponding authors: Hyungjin Eoh ([heoh@usc.edu](mailto:heoh@usc.edu)).

**Supplementary Information**

This PDF file includes:

Supplementary Figures 1 to 8

Supplementary Tables 1 to 2

**Supplementary Figures and Legends**


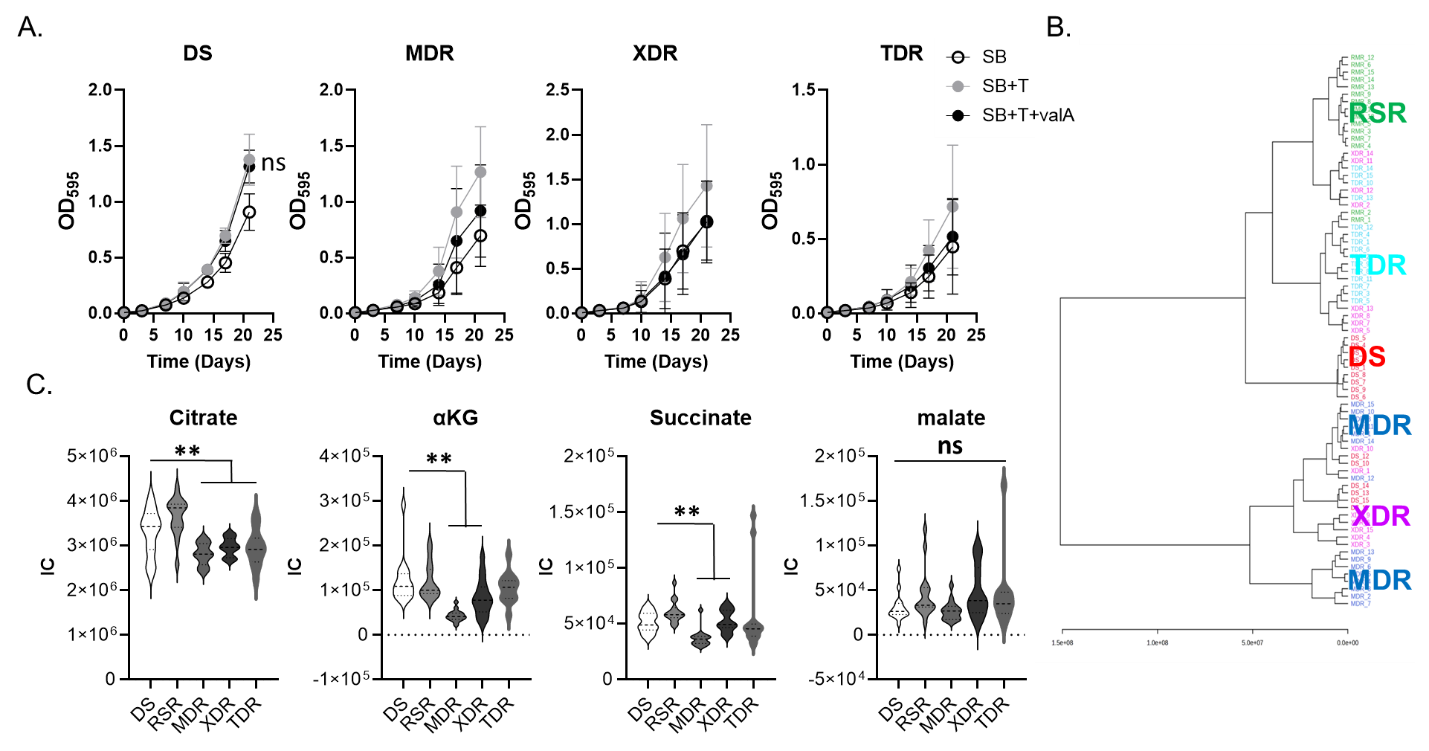


**Supplementary Figure 1**

Supplementary Fig. 1. **Metabolic networks of TB clinical isolates utilized to consume trehalose.**

**A**. Growth kinetics of drug-sensitive (DS)-, RSR-, MDR-, XDR-, and TDR- clinical TB isolates in m7H9 supplemented with 10 mM sodium butyrate (SB) were monitored by measuring OD595. The effects of co-treatment with either 20 mM trehalose (T) or a combination of trehalose and 200 µM validamycin A (Val A) on their growth were assessed. Due to the heterogeneity in growth kinetics, there was significant variability in the DR-TB clinical isolates, which hindered appropriate statistical analysis. However, the results clearly indicate that the trehalose-mediated growth enhancement was diminished by co-treatment with ValA only in DR-TB clinical isolates. Values represent the average of biological replicates ± s.e.m. ns, not significant by ANOVA between SB + T and SB + T + Val A.

**B**. The phylogram generated from metabolomics analysis illustrates the phylogenetic relationships among five categories of TB clinical isolates. Due to metabolic heterogeneity, some strains were identified as outliers. Bootstrap values are based on 100 iterations.

**C**. Targeted metabolomics revealed the intrabacterial abundance of TCA cycle intermediates detected in the five categories of TB clinical isolates when cultured in m7H9 with 20 mM trehalose. Data points represent the average of 15 biological replicates ± s.e.m. **, P < 0.05 by Student’s t-test.


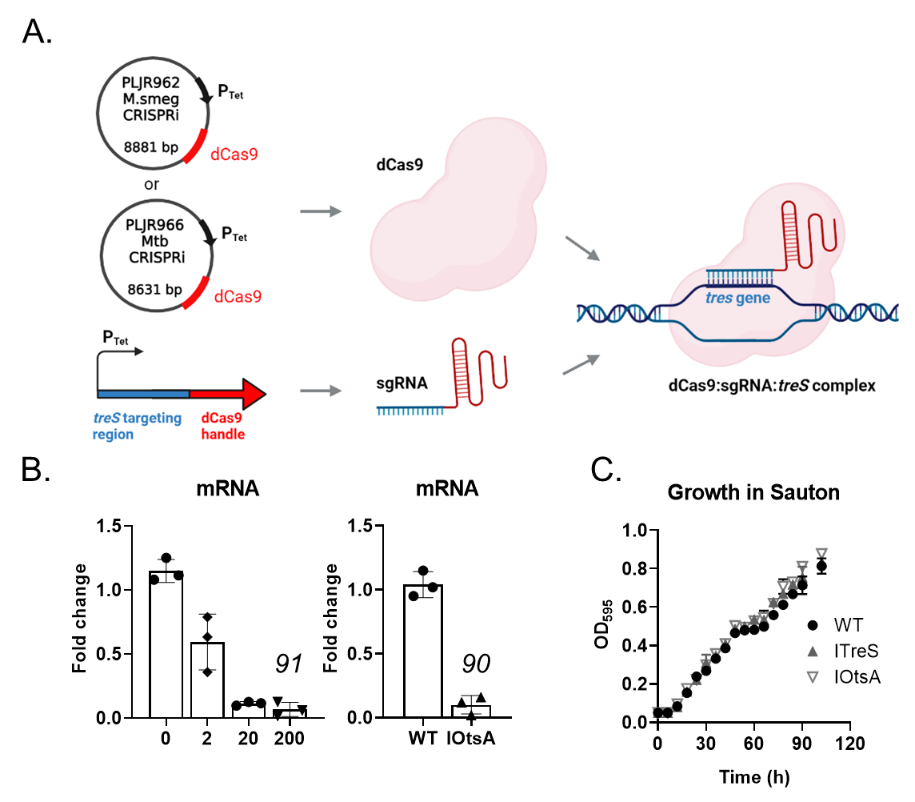


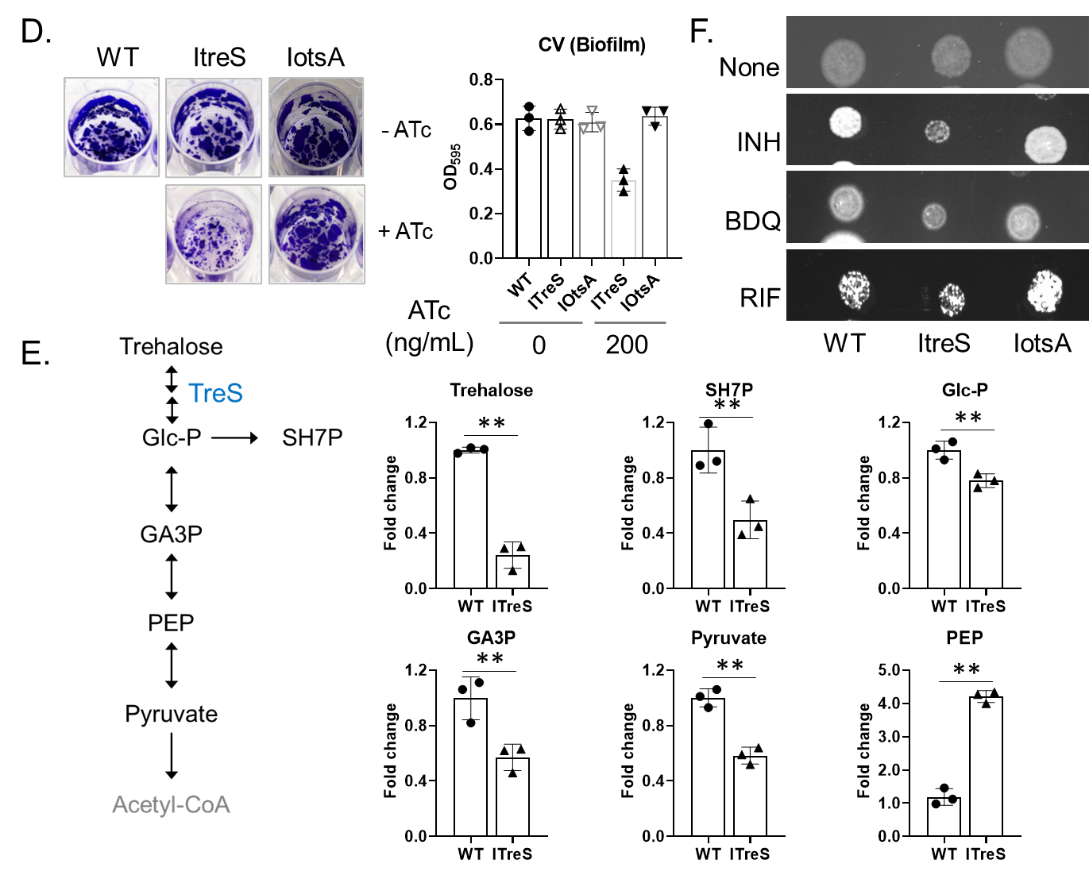


**Supplementary Figure 2**

Supplementary Fig. 2. ***M. smegmatis* deficient in *treS* phenocopies Mtb mutants lacking trehalose catalytic shift.**

**A**. A schematic diagram illustrating the generation of CRISPR*i* knockdown mutants in the genetic backgrounds of *M. smegmatis* or *M. tuberculosis*.

**B**. Left panel: Suppression of *treS* mRNA expression in ItreSSM (CRISPR*i* *treS* KD *M. smegmatis* mutant) after treatment with 0, 2, 20, and 200 ng/mL Anhydrotetracycline (ATc). Right panel: Suppression of *otsA* mRNA expression in IotsASM (CRISPR*i* *otsA* KD *M. smegmatis* mutant) after treatment with 200 ng/mL ATc.

**C**. Growth kinetics of ItreSSM and IotsASM in Sauton media, which promotes the formation of biofilm-persister bacilli. The growth kinetics of wildtype *M. smegmatis* areincluded as a control.

**D**. The level of biofilm-persister formation in ItreSSM and IotsASM, with or without treatment with 200 ng/mL of ATc. The biofilm-persister formation of wildtype *M. smegmatis* is included as a control. Right panel: Levels of biofilm-persister formation are depicted using the CV staining method.

**E**. Targeted metabolomics analysis of wildtype *M. smegmatis* and ItreSSM. The graph shows the fold change when cultured in trehalose-containing m7H9 relative to m7H9 alone. **, P<0.01; n.s., not significant by Student’s t-test.

**F**. A spot assay using ItreSSM and IotsASM in m7H10 containing various antibiotics, such as INH, RIF, or BDQ. Colony formation was compared with that in antibiotic-free m7H10.


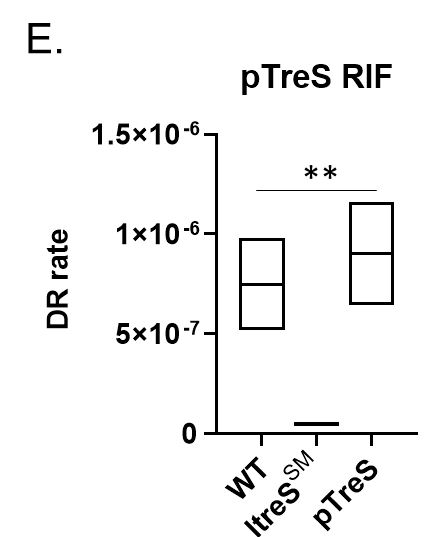

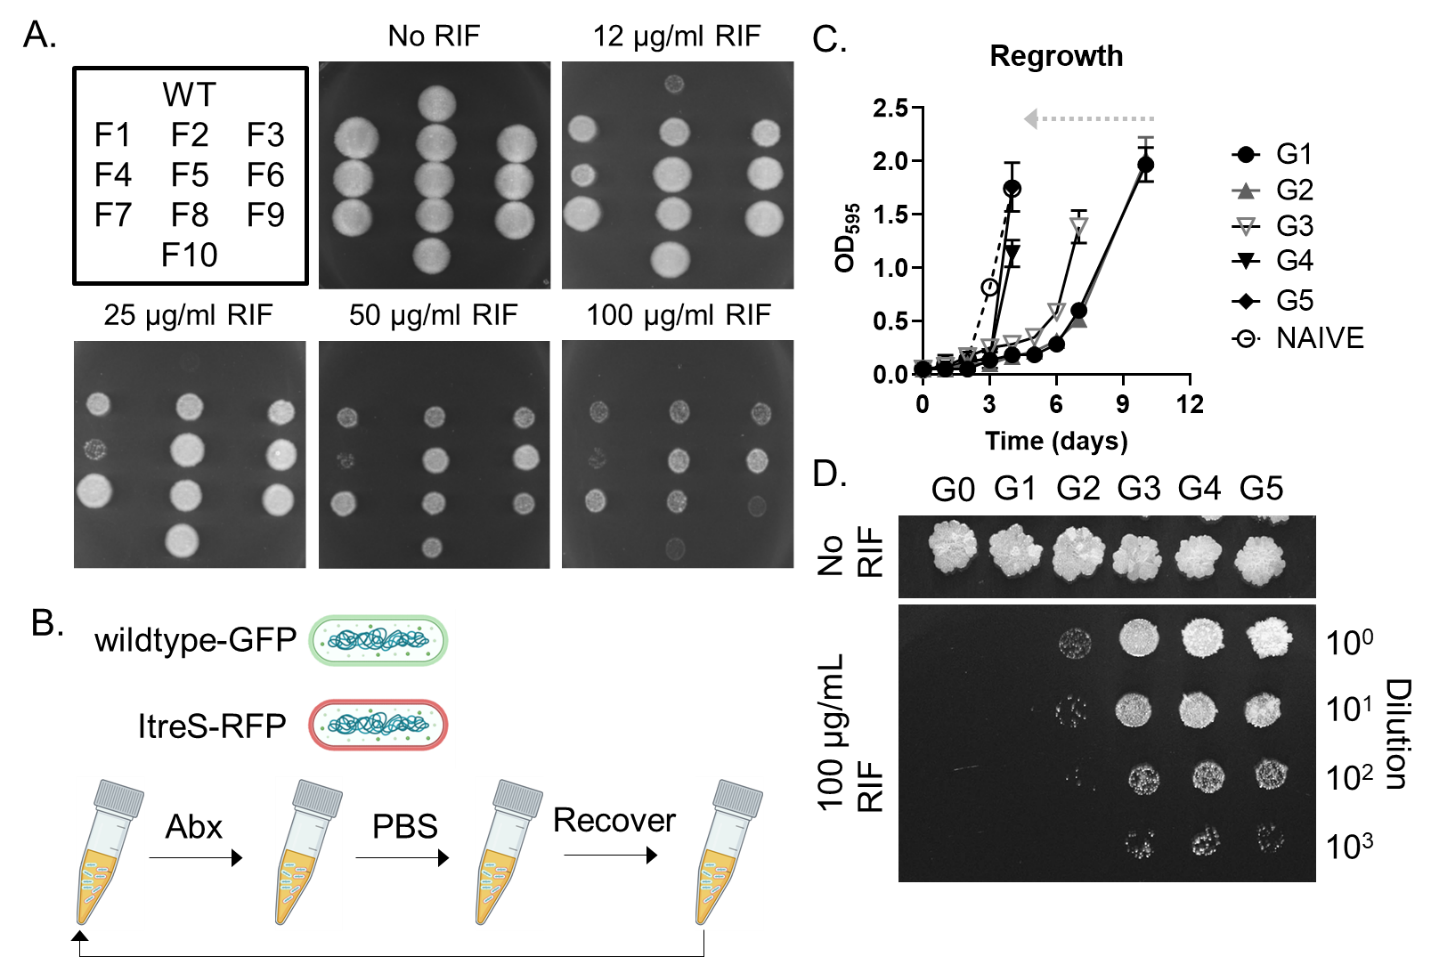


**Supplementary Figure 3**

Supplementary Fig. 3. **The role of trehalose catalytic shift in the emergence of drug resistance.**

**A**. A spot assay using RIF-resistant *M. smegmatis* bacilli obtained from the classical fluctuation assay on m7H10, with various concentrations of RIF ranging from 0 to100 µg/mL. Naïve *M. smegmatis* (WT) bacilli were included as a control.

**B**. A schematic diagram illustrating the method of coculture competition assay using a mixture of wildtype *M. smegmatis* harboring GFP and ItreSSM harboring RFP. The mixture was intermittently treated with 100 µg/mL RIF or DCS for 1 day, producing G0-G5 cultures.

**C**. Growth kinetics of G0-G5 cultures in antibiotic-free m7H9 immediately after RIF treatment. Naïve *M. smegmatis* bacilli were included as a control.

**D**. A spot assay using G0-G5 cultures on m7H10 containing 100 µg/mL RIF. Colony formation was compared with that in antibiotic-free m7H10.

**E**. The rates at which wildtype *M. smegmatis*, ItreSSM, and pTreS acquired spontaneous RIF resistance per generation were measured using the classical fluctuation assay. All values represent the average of 25 biological replicates ± s.e.m. **, P < 0.01 by Student’s t-test.


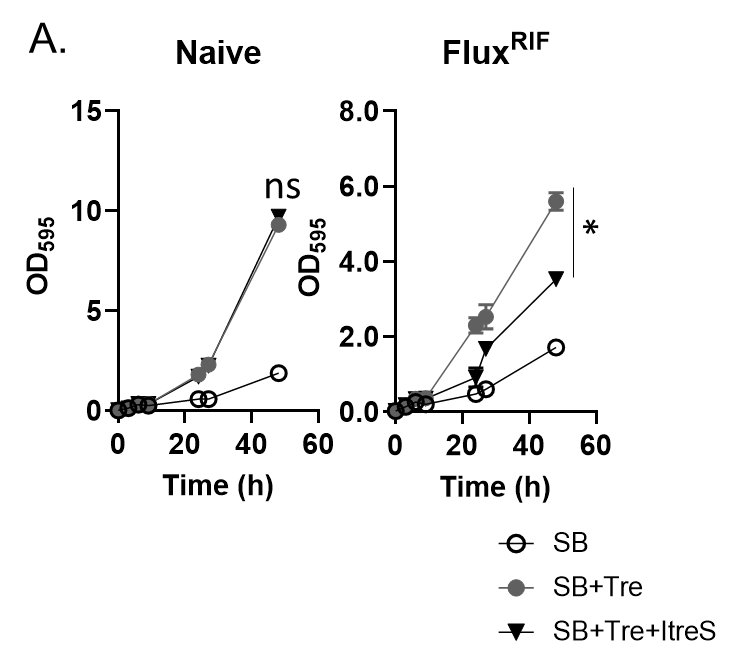

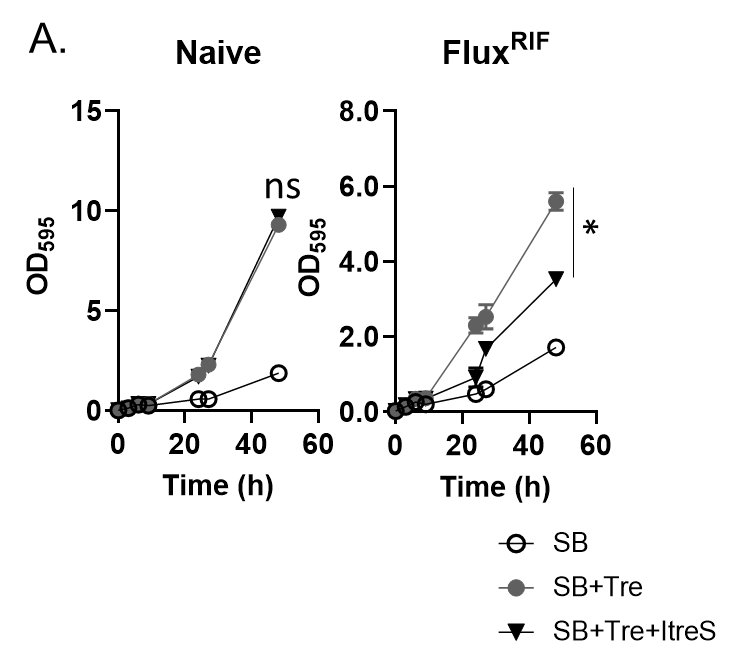


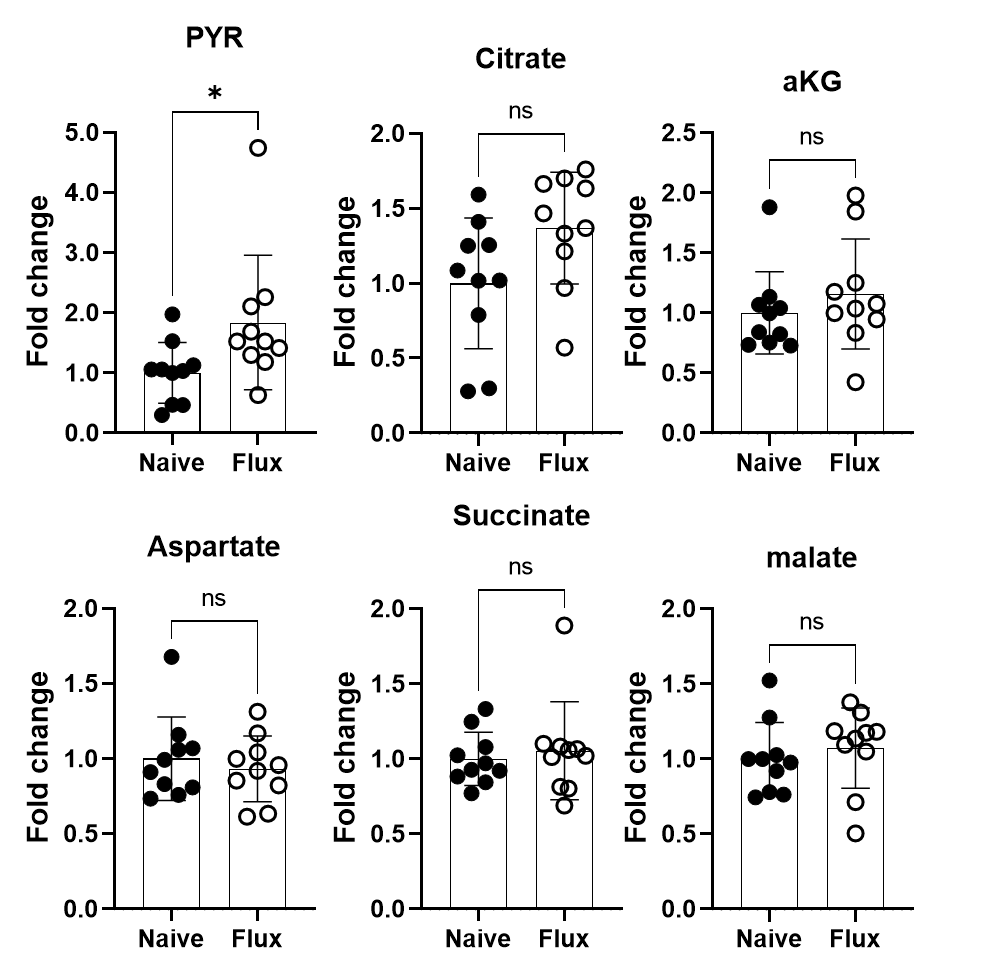

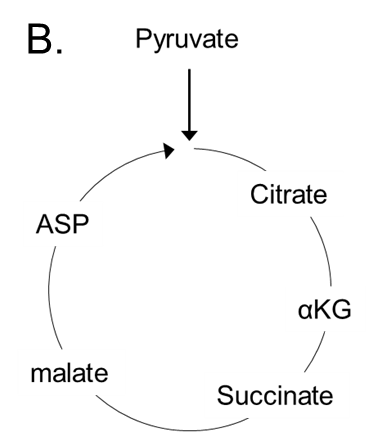


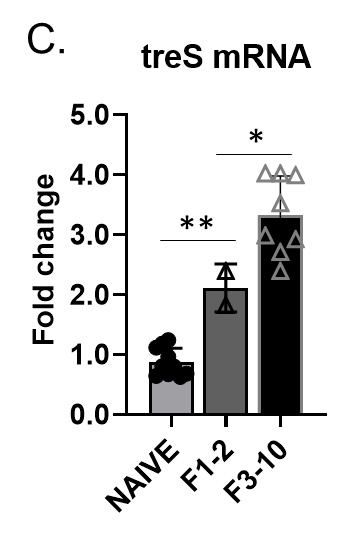


**Supplementary Figure 4**

Supplementary Fig. 4. **Biochemical and metabolic properties of FluxRIF bacilli**.

**A**. Growth kinetics of wildtype *M. smegmatis*, FluxRIF, and ItreSFlux bacilli in m7H9 containing sodium butyrate (SB) with or without 20 mM trehalose (Tre).

**B**. Targeted metabolomics analysis of wildtype *M. smegmatis* and FluxRIF bacilli after culturing in m7H9 with or without 20 mM trehalose. The analysis is represented by the fold changes in TCA cycle metabolite abundance for each strain cultured in m7H9 with trehalose relative to that in m7H9 without trehalose.

**C**. *treS* mRNA expression levels in naïve *M. smegmatis* and FluxRIF #1 and #2 (RRDR-mutation mediated FluxRIF), and FluxRIF #3 - #10 (RRDR mutation-free FluxRIF) bacilli.

All values represent the average of biological replicates ± s.e.m. *, P < 0.05; **, P<0.01 by Student’s t-test.


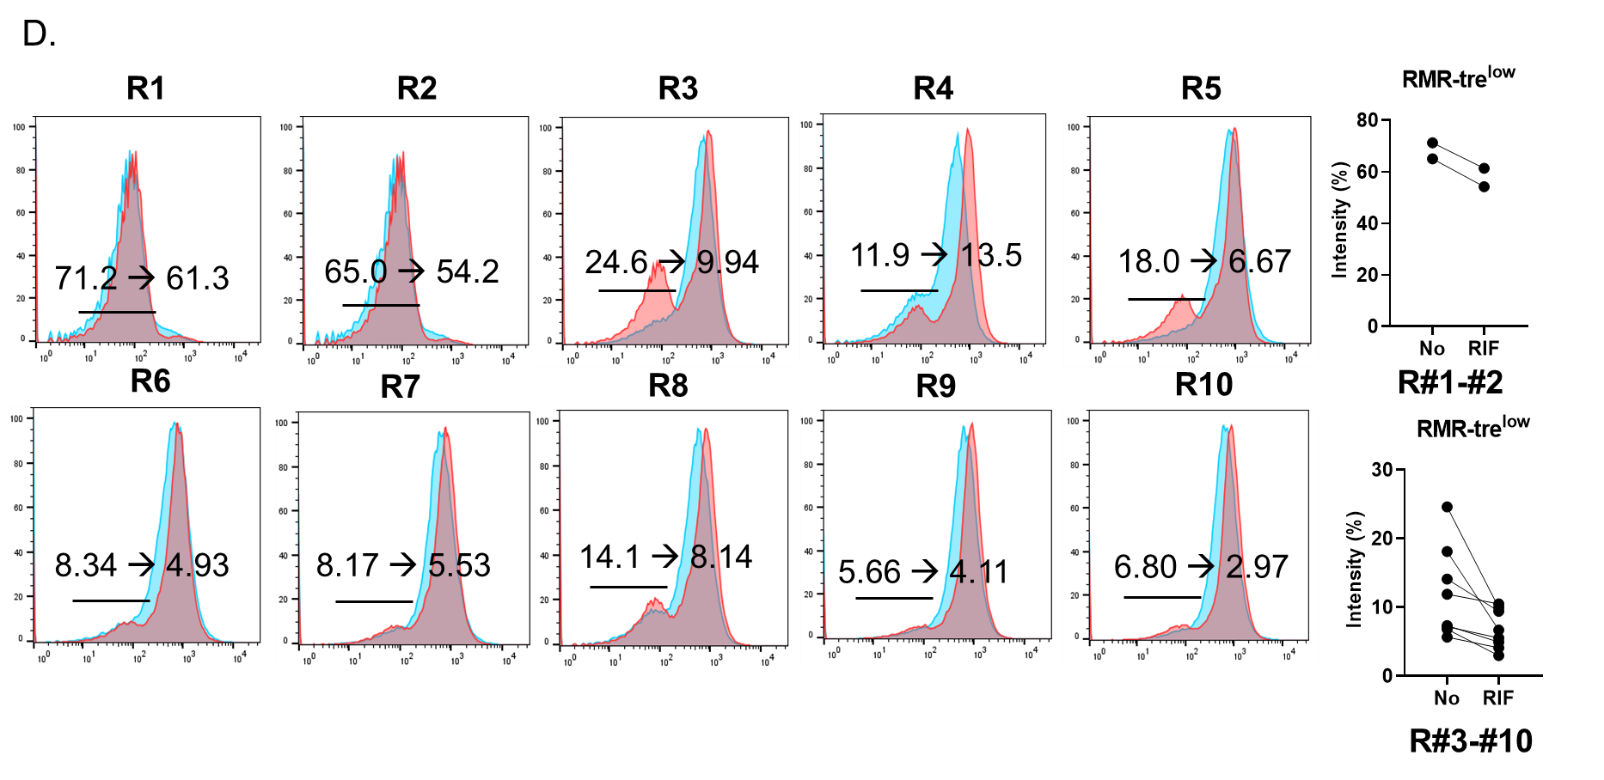

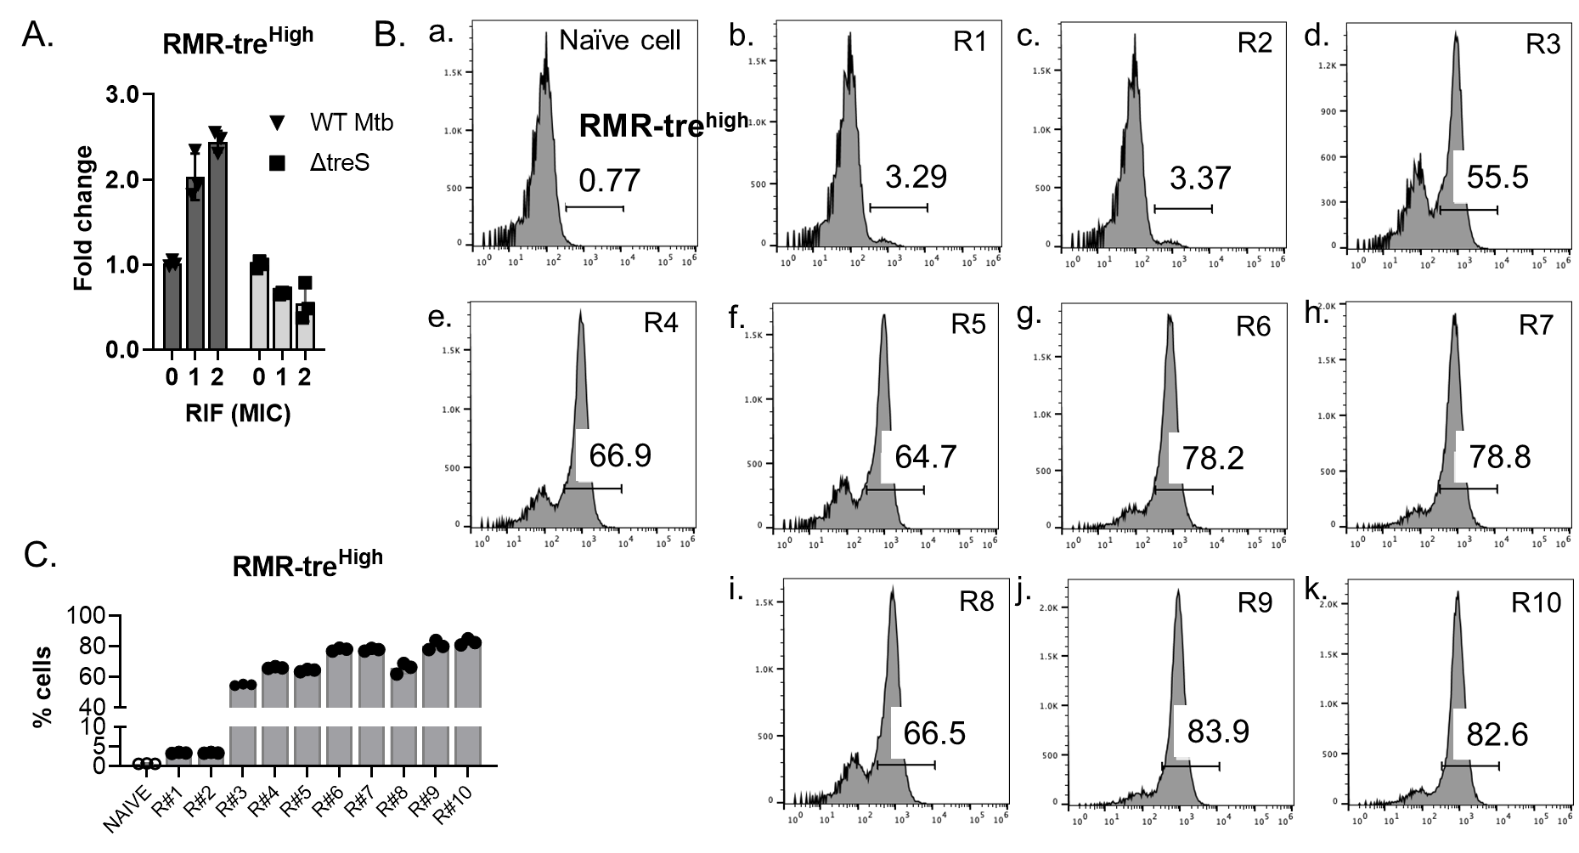


**Supplementary Figure 5**

Supplementary Fig. 5. **Labeling with RMR-trehalose fluorogenic dye (RMR-tre) as a method to monitor trehalose catalytic shift activity.**

**A**. The newly emerged RMR-trehigh population in naïve or ΔtreS Mtb was monitored by flow cytometry after treatment with 1X or 2X MIC RIF.

**B**. Intensity of the RMR-trehigh population in naïve *M. smegmatis* (panel a) and in FluxRIF bacilli #1-#10 (panels b-k).

**C**. The percentage fraction of the RMR-trehigh population in each FluxRIF strain is depicted in a bar graph.

**D**. An overlay illustrating the change in RMR-trelow population intensity in naïve *M. smegmatis* and the 10 FluxRIF bacilli before (blue) and after (red) treatment with 100 µg/mL RIF. Inset graphs show the change of RMR-trelow population abundance in FluxRIF #1-#2 (upper panel) and FluxRIF#3-#10 (lower panel) before and after RIF treatment.


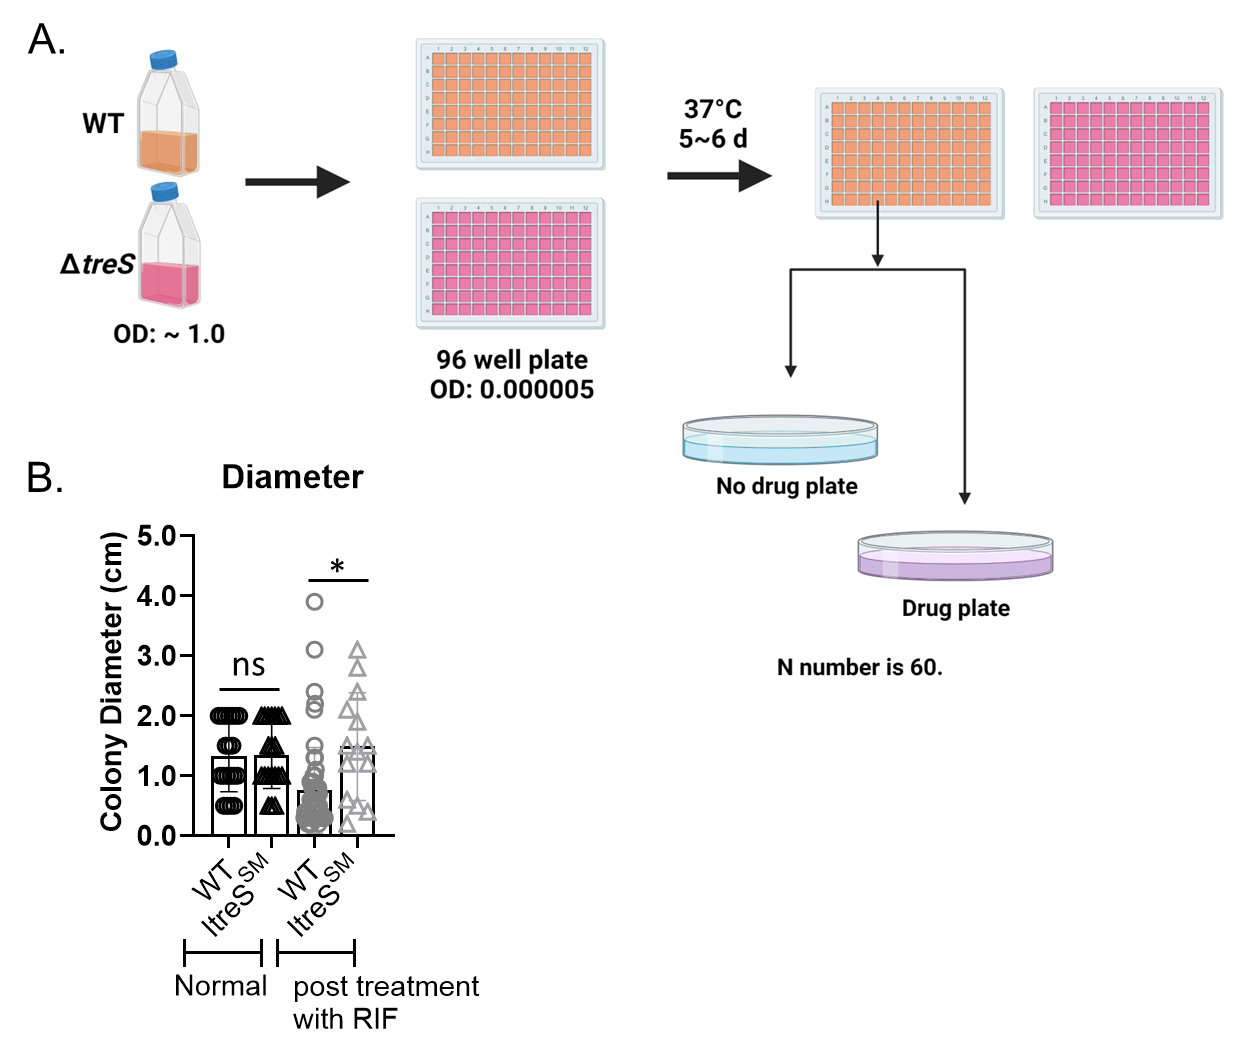


**Supplementary Figure 6**

Supplementary Fig. 6. **Fluctuation assay for mathematical modeling simulation**.

**A**. To generate a single-cell suspension of *M. smegmatis* wildtype and ItreSSM, cultures were diluted to an OD595, 0.000005 in 200 µL of m7H9 in 96-well plates. The cultures were then regrown until they reached an OD595 of 0.7-1.0. A total of 100 µL from 60 randomly selected colonies were plated on m7H10 containing 100 µg/mL of RIF. Spontaneous RIF-resistant colonies were counted after incubating for up to 10 days. To determine the total viable input cell number, the remaining 100 µL of the cultures were serially diluted and plated on m7H10 without antibiotics.

**B**. The diameter of wildtype and ItreSSM colonies forming on antibiotic-free m7H10 after recovery from treatment with 100 µg/mL of RIF for 3 days.


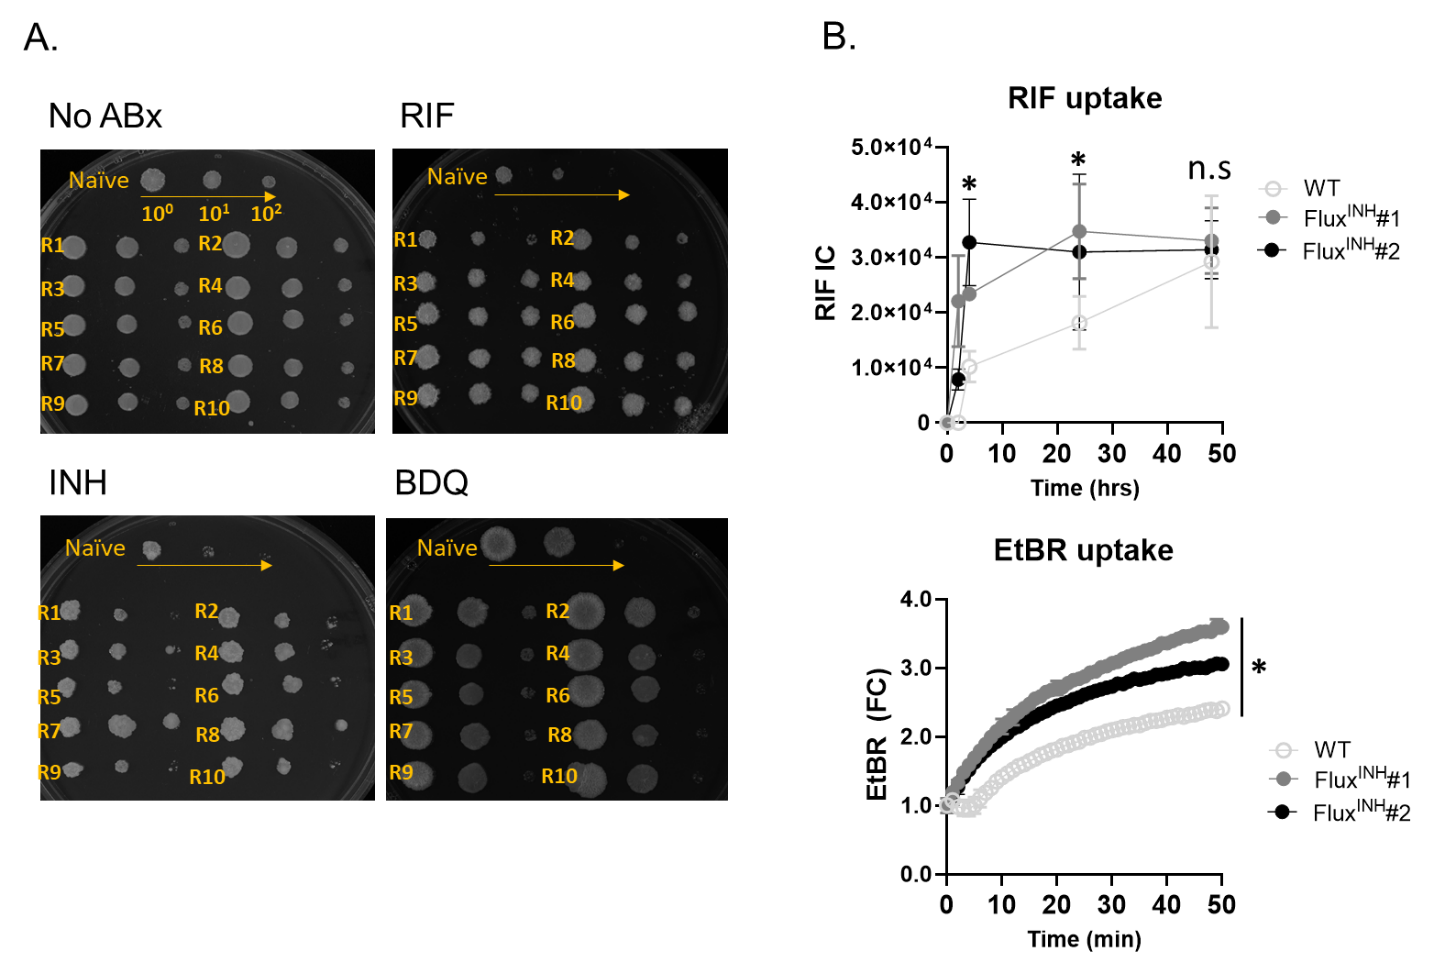


**Supplementary Figure 7**

Supplementary Fig. 7. **The role of trehalose catalytic shift in the emergence of antibiotic cross-resistance**.

**A**. A spot assay was conducted using FluxRIF #1 - #10 on m7H10 containing INH, RIF, or BDQ. Naïve *M. smegmatis* bacilli were included as a control.

**B**. RIF uptake kinetics for naïve *M. smegmatis* and FluxINH #1 and #2 were monitored through LC-MS quantification after a 2 day-incubation. All values represent the average of biological replicates ± s.e.m. *, P < 0.05; n.s, not significant by Student’s t-test.

**C**. EtBr uptake kinetics for naïve *M. smegmatis* and FluxINH #1 and #2 were monitored after a 60-min incubation.


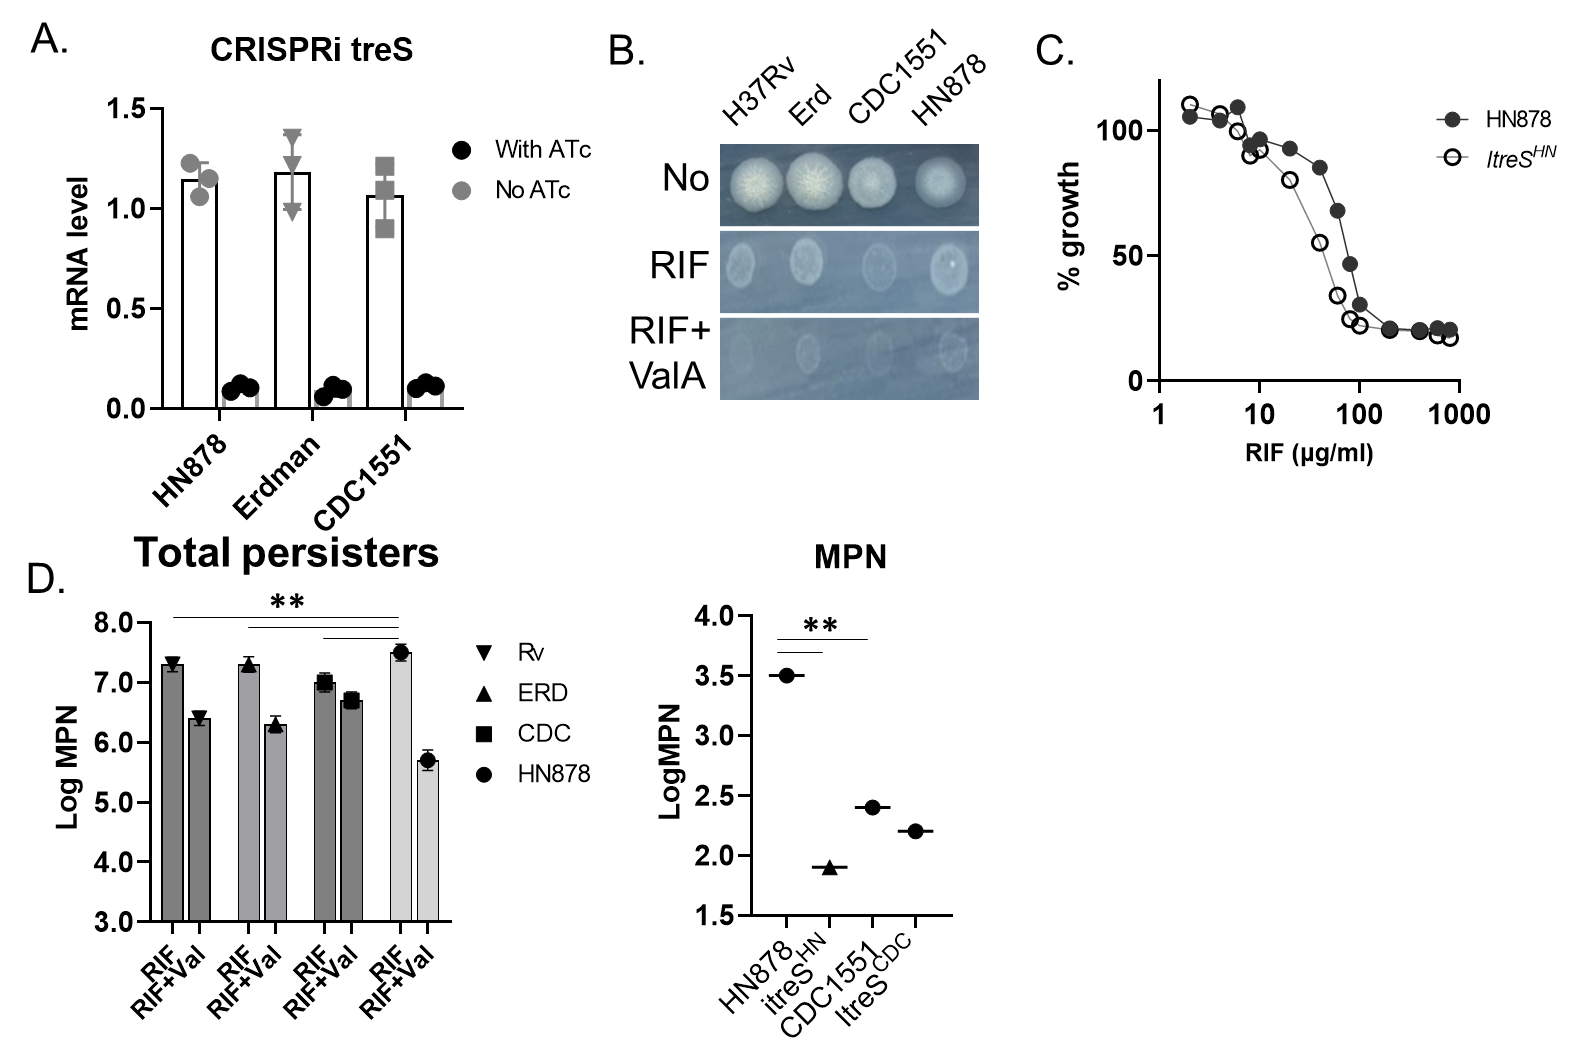


**Supplementary Figure 8**

S Fig. 8. **Characterization of HN878’s trehalose catalytic shift.**

**A**. Suppression of mRNA expression in ItreS (CRISPR*i* *treS* knockdown in the genetic background of *M. tuberculosis* clinical strains such as HN878, Erdman, and CDC1551) after treatment with 0 or 200 ng/mL ATc*.*

**B**. A spot assay was performed using H37Rv, Erdman, CDC1551, and HN878 to assess the effect of ValA (TreS specific inhibitor) on their colony formation on m7H10 containing RIF.

**C**. IC50 values of RIF against HN878 and ItreSHN (CRISPR*i* *treS* knockdown in *M. tuberculosis* HN878).

**D**. MPN method was performed using H37Rv, Erdman, CDC1551, and HN878 before and after treatment with ValA (TreS specific inhibitor), as well as ItreSHN or ItreSCDC after treatment with ATc.
